# Supplementary material for: New dendritic ionic liquids (DILs) for the extraction of metallic species from water
Source: Royal Society of Chemistry journal article supplement (doi:10.1039/c8nj01921e), 2018-01-01
Supplement: c8nj01921e1.pdf [file c8nj01921e1.pdf]

Supplementary material

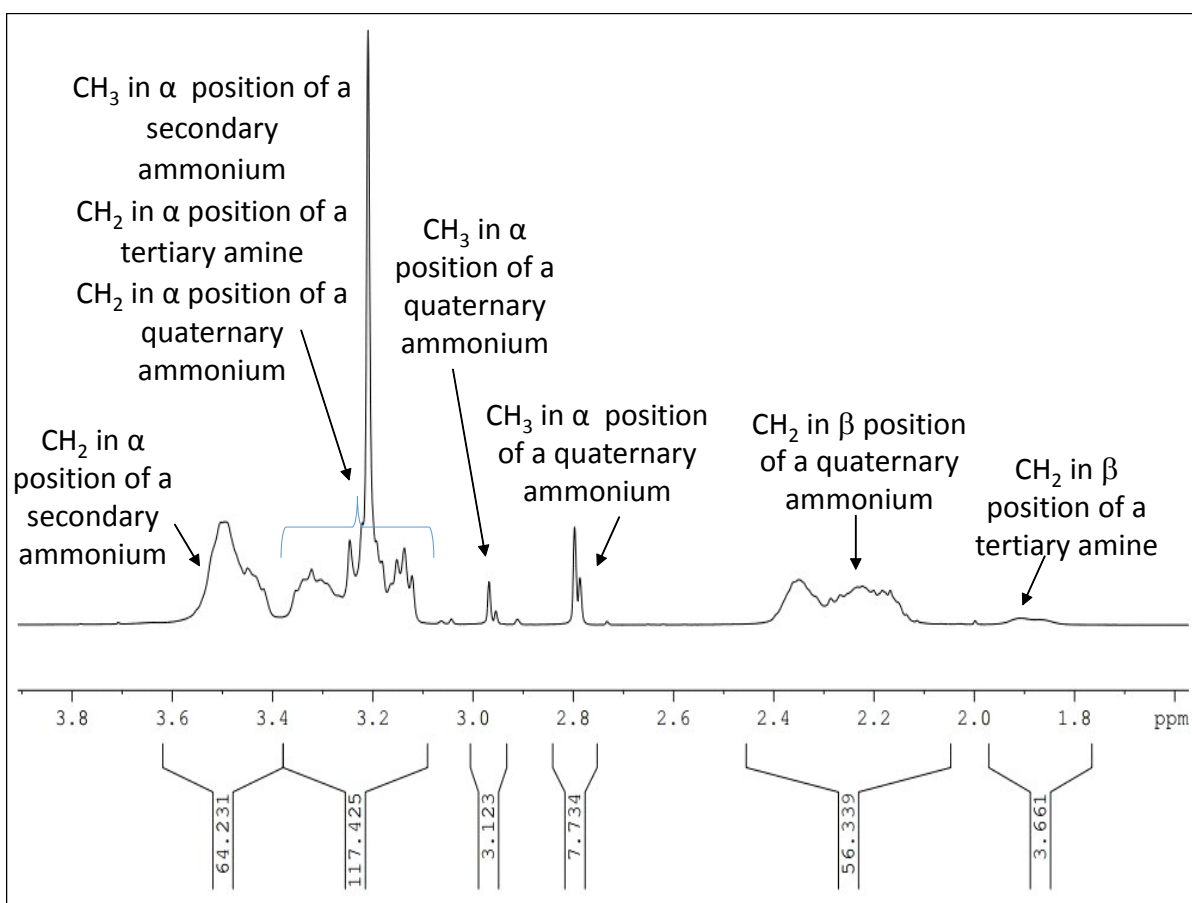

$^1\text{H}$  NMR spectrum of PPI G3  $\text{NH}_2 \text{Me}^+ \text{BF}_4^-$

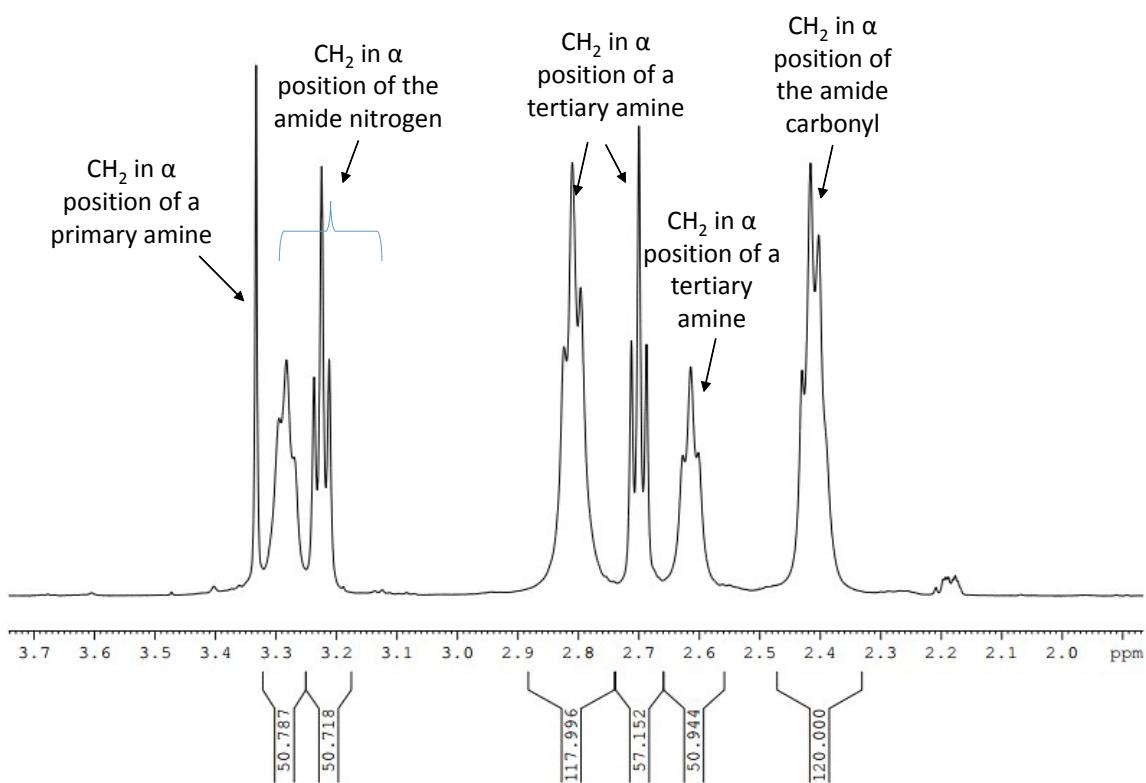

$^1\text{H}$  NMR spectrum of PAMAM G3  $\text{NH}_2 \text{Me}^+ \text{BF}_4^-$
